# Supplementary material for: Ionizable lipid nanoparticles enhance lung delivery of gold nanoclusters for improving acute lung injury alleviation
Source: Royal Society of Chemistry journal article supplement (doi:10.1039/d4nr05415f), 2025-01-01
Supplement: d4nr05415f1.pdf [file d4nr05415f1.pdf]

## Supporting Information

### **Ionizable Lipid Nanoparticles Enhance Lung-Delivery of Gold Nanocluster for Improving Acute Lung Injury Alleviation**

Yongning Bian,<sup>‡a</sup> Yanggege Li,<sup>‡a</sup> Dongfang Xia,<sup>a</sup> Yuanyu Huang,<sup>b</sup> Xueyun Gao,<sup>a</sup>  
Dongdong Su,<sup>\*a</sup> and Qing Yuan,<sup>\*a</sup>

<sup>a</sup>Center of Excellence for Environmental Safety and Biological Effects, Department of Chemistry, Beijing University of Technology, Beijing 100124, P. R. China.

<sup>b</sup>School of Life Science, Advanced Research Institute of Multidisciplinary Science, Beijing Institute of Technology, Beijing 100081, P. R. China.

E-mail: [chmsudd@bjut.edu.cn](mailto:chmsudd@bjut.edu.cn), [yuanqing@bjut.edu.cn](mailto:yuanqing@bjut.edu.cn)

<sup>‡</sup>These authors contributed equally to this work.

**Table S1** Compositions and proportion of iLNPs.

| Component       | MW    | w/w   |
|-----------------|-------|-------|
| Ionizable lipid | 967   | 33.4% |
| DSPC            | 790.2 | 6.1%  |
| Cholesterol     | 386.7 | 14.9% |
| DMG-PEG2000     | 2538  | 4.1%  |
| DOTAP           | 698.6 | 41.6% |

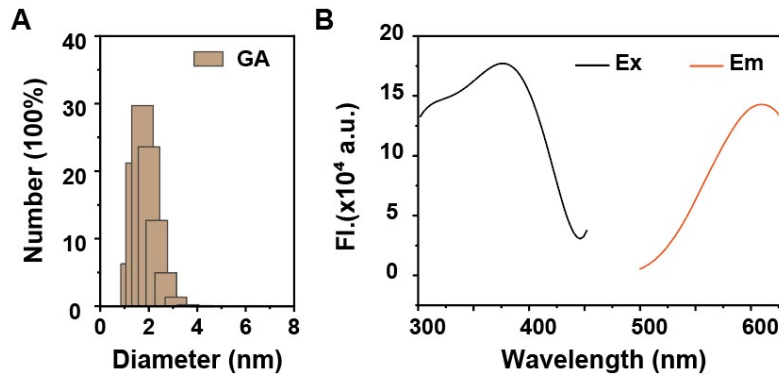

**Figure S1.** (A) The hydrodynamic diameter distribution of GA. (B) The excitation and emission fluorescence spectra of GA.

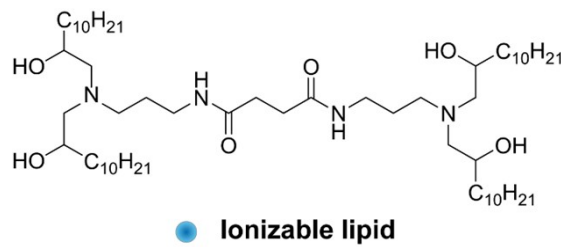

**Figure S2.** The structure of the ionizable lipid.

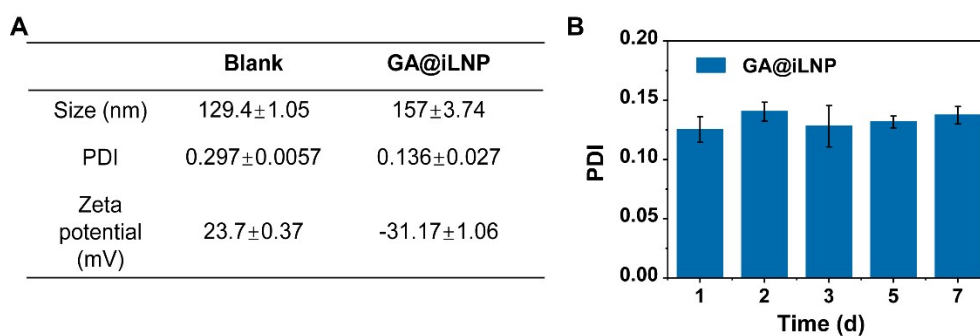

**Figure S3.** (A) Physicochemical property characterization of iLNP before and after GA encapsulation, which includes the size, PDI and zeta potential. (B) The PDI of GA@iLNP at different times after preparation.

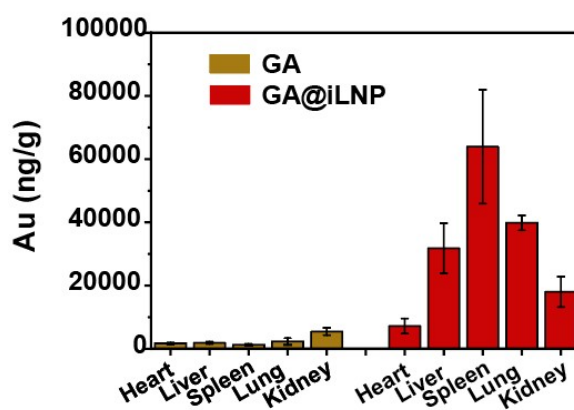

**Figure S4.** The biodistribution of a single dose of GA (5 mg/kg) and GA@iLNP (containing GA 5 mg/kg) injected intravenically (*i.v.*) in BALB/c mice was compared.

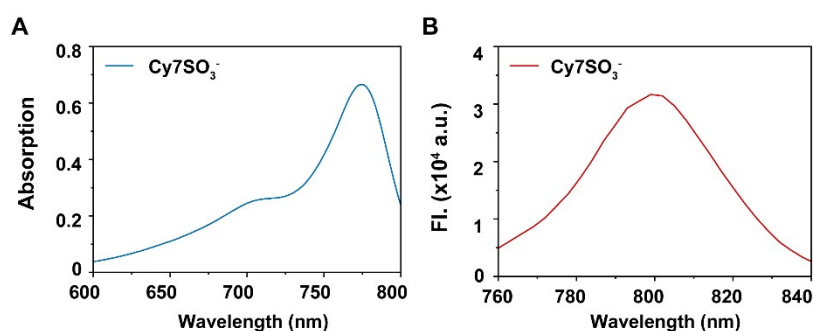

**Figure S5.** The UV absorption (A) and fluorescence spectra (B) of  $\text{Cy7SO}_3^-$ .

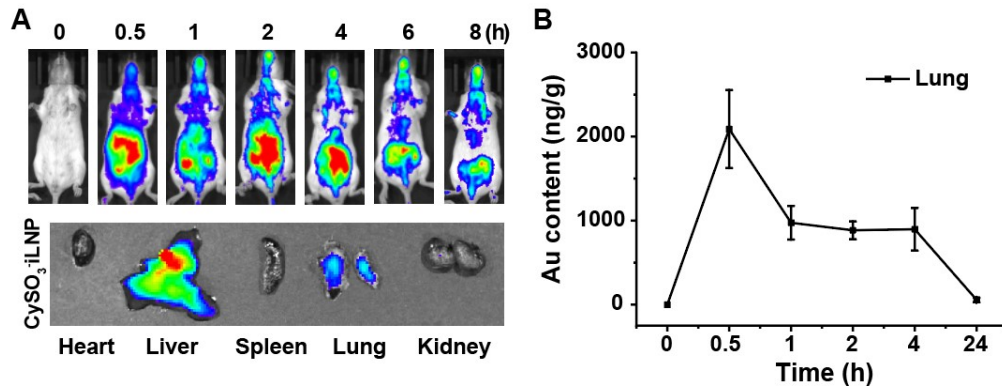

**Figure S6.** *In vivo* distribution of intravenously injected lung-targeted iLNP. (A) *In vivo* and *ex vivo* fluorescence imaging after intravenous injection of the fluorescent nanoprobe CySO<sub>3</sub>@iLNP (100 μM, 100 μL). (B) The Au content distribution in lungs after *i.v.* injection of GA@iLNP (contained GA 5 mg/kg).

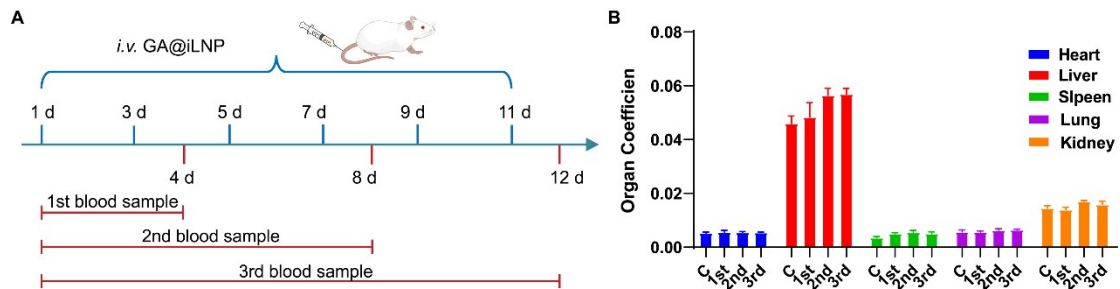

**Figure S7.** (A) The experimental protocol for long-term safety monitoring and (B) organ coefficient statistics of each group. Data are presented as means ± SD, n = 3.

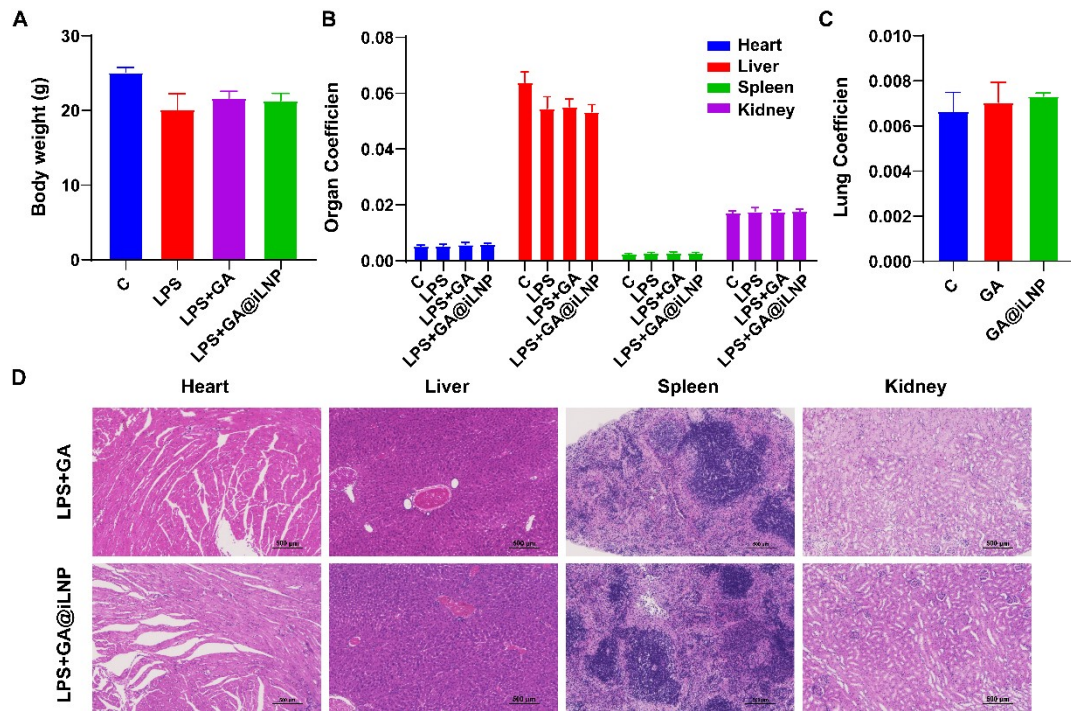

**Figure S8.** (A) The body weight of each group was compared: Control, LPS, LPS + GA, LPS + GA@iLNP. Data are presented as means  $\pm$  SD, n = 5. (B) The organ coefficients of major organs from each group. Data are presented as means  $\pm$  SD, n = 5. (C) The lung coefficients from control and GA or GA@iLNP treated normal mice. (D) HE staining of major organs from LPS + GA and LPS + GA@iLNP treated groups.

**Table S2** Blood cell indexes of mice treated with GA@iLNP (mean values  $\pm$  SD, n=3).

| Parameter                                                     | Short name | Ctrl               | day 4             | day 8              | day 12             | Unit                | Reference value range |
|---------------------------------------------------------------|------------|--------------------|-------------------|--------------------|--------------------|---------------------|-----------------------|
| White blood cell count                                        | WBC        | 3.59 $\pm$ 0.37    | 2.74 $\pm$ 0.11   | 3.54 $\pm$ 0.49    | 3.27 $\pm$ 0.54    | 10 <sup>9</sup> /L  | 0.80 - 10.60          |
| Neutrophil count                                              | Neu#       | 0.72 $\pm$ 0.06    | 0.68 $\pm$ 0.09   | 0.63 $\pm$ 0.14    | 0.76 $\pm$ 0.15    | 10 <sup>9</sup> /L  | 0.23 - 3.60           |
| Lymphocyte count                                              | Lym#       | 2.78 $\pm$ 0.34    | 1.97 $\pm$ 0.13   | 2.83 $\pm$ 0.39    | 2.4 $\pm$ 0.39     | 10 <sup>9</sup> /L  | 0.60 - 8.90           |
| Monocytes count                                               | Mon#       | 0.067 $\pm$ 0.01   | 0.05 $\pm$ 0.008  | 0.053 $\pm$ 0.026  | 0.073 $\pm$ 0.068  | 10 <sup>9</sup> /L  | 0.04 - 1.40           |
| Eosinophil granulocyte count                                  | Eos#       | 0.02 $\pm$ 0.01    | 0.04 $\pm$ 0.03   | 0.017 $\pm$ 0.004  | 0.033 $\pm$ 0.004  | 10 <sup>9</sup> /L  | 0.00 - 0.51           |
| Basophil granulocyte count                                    | Bas#       | 0                  | 0                 | 0                  | 0                  | 10 <sup>9</sup> /L  | 0.00 - 0.12           |
| Percentage of neutrophil                                      | Neu%       | 20 $\pm$ 1.5       | 24.7 $\pm$ 3.56   | 17.77 $\pm$ 2.45   | 22.97 $\pm$ 0.82   | %                   | 6.5 - 50.0            |
| Percentage of lymphocyte                                      | Lym%       | 77.33 $\pm$ 1.73   | 71.7 $\pm$ 2.77   | 80.13 $\pm$ 3.24   | 73.5 $\pm$ 1.87    | %                   | 40.0 - 92.0           |
| Percentage of monocytes                                       | Mon%       | 1.97 $\pm$ 0.55    | 2.03 $\pm$ 0.26   | 1.533 $\pm$ 0.76   | 2.33 $\pm$ 1.96    | %                   | 0.9 - 18.0            |
| Percentage of eosinophil granulocyte                          | Eos%       | 0.67 $\pm$ 0.3     | 1.57 $\pm$ 0.94   | 0.57 $\pm$ 0.09    | 1.2 $\pm$ 0.45     | %                   | 0.0 - 7.5             |
| Percentage of Basophil granulocyte                            | Bas%       | 0.03 $\pm$ 0.04    | 0                 | 0                  | 0                  | %                   | 0.0 - 1.5             |
| Red blood cell count                                          | RBC        | 12.3 $\pm$ 0.3     | 11.92 $\pm$ 0.47  | 12.29 $\pm$ 0.28   | 10.36 $\pm$ 2.17   | 10 <sup>12</sup> /L | 6.50 - 11.50          |
| Hemoglobin                                                    | HGB        | 199 $\pm$ 3.56     | 191 $\pm$ 9.27    | 196.33 $\pm$ 2.35  | 169.67 $\pm$ 35.6  | g/L                 | 110 - 165             |
| Hematocrit                                                    | HCT        | 55.47 $\pm$ 0.68   | 53.37 $\pm$ 2.52  | 55.53 $\pm$ 1.45   | 48.07 $\pm$ 9.5    | %                   | 35.0 - 55.0           |
| Mean corpuscular volume                                       | MCV        | 45.1 $\pm$ 0.8     | 44.73 $\pm$ 0.45  | 45.17 $\pm$ 0.66   | 46.47 $\pm$ 1.71   | fL                  | 41.0 - 55.0           |
| Mean hemoglobin content of red blood cells                    | MCH        | 16.2 $\pm$ 0.32    | 16 $\pm$ 0.21     | 15.97 $\pm$ 0.26   | 16.37 $\pm$ 0.6    | pg                  | 13.0 - 18.0           |
| Mean concentration of red blood cell hemoglobin               | MCHC       | 359.33 $\pm$ 1.69  | 358.33 $\pm$ 2.05 | 353.33 $\pm$ 4.78  | 352.67 $\pm$ 4.78  | g/L                 | 300 - 360             |
| Coefficient of variation of red blood cell distribution width | RDW-CV     | 14.3 $\pm$ 0.21    | 15.73 $\pm$ 1.39  | 15.03 $\pm$ 0.82   | 14.1 $\pm$ 0.163   | %                   | 12.0 - 19.0           |
| Standard deviation of red blood cell distribution width       | RDW-SD     | 29.03 $\pm$ 0.83   | 31.53 $\pm$ 2.52  | 30.4 $\pm$ 2.11    | 28.931.18          | fL                  | 23.0 - 39.0           |
| Platelet count                                                | PLT        | 572.33 $\pm$ 34.99 | 579 $\pm$ 114.5   | 836.33 $\pm$ 198.5 | 458.33 $\pm$ 45.06 | 10 <sup>9</sup> /L  | 400 - 1600            |
| Mean platelet volume                                          | MPV        | 5.9 $\pm$ 0.37     | 5.93 $\pm$ 0.2    | 6.13 $\pm$ 0.25    | 6.37 $\pm$ 0.3     | fL                  | 4.0 - 6.2             |
| Width of platelet distribution                                | PDW        | 16.9 $\pm$ 0.16    | 16.47 $\pm$ 0.25  | 16.63 $\pm$ 0.33   | 16.6 $\pm$ 0.22    | fL                  | 12.0 - 17.5           |
| Thrombocytopenia                                              | PCT        | 0.337 $\pm$ 0.001  | 0.347 $\pm$ 0.08  | 0.509 $\pm$ 0.1    | 0.294 $\pm$ 0.04   | %                   | 0.100 - 0.780         |

**Table S3** Biochemical indexes of mice treated with GA@iLNP (mean values  $\pm$  SD, n=3).

| Parameter                  | Short name | Ctrl             | day 4           | day 8            | day 12           | Unit        | Reference value range |
|----------------------------|------------|------------------|-----------------|------------------|------------------|-------------|-----------------------|
| Alanine aminotransferase   | ALT        | 29.4 $\pm$ 3.3   | 31.1 $\pm$ 1.37 | 33.4 $\pm$ 1.4   | 34.7 $\pm$ 4.1   | U/L         | 10.06-96.47           |
| Aspartate aminotransferase | AST        | 87.9 $\pm$ 13.51 | 91.1 $\pm$ 9.89 | 89.3 $\pm$ 3.0   | 72.9 $\pm$ 4.53  | U/L         | 36.31-235.48          |
| Alkaline phosphatase       | ALP        | 184.3 $\pm$ 9.29 | 121 $\pm$ 3.86  | 133.9 $\pm$ 7.39 | 131.3 $\pm$ 17.9 | U/L         | 22.52-474.35          |
| Urea nitroge               | BUN        | 7.5 $\pm$ 0.51   | 6.8 $\pm$ 0.55  | 8.03 $\pm$ 0.64  | 7.01 $\pm$ 0.13  | mmol/L      | 10.81-34.74           |
| Creatinine                 | CREA       | 16.7 $\pm$ 3.18  | 17.8 $\pm$ 3.31 | 14.7 $\pm$ 0.49  | 14.3 $\pm$ 1.63  | $\mu$ mol/L | 10.91-85.09           |
